# Supplementary material for: Auditory Emotion Recognition Impairments in Schizophrenia: Relationship to Acoustic Features and Cognition
Source: Atypon-hosted journal article supplement (doi:10.1176/appi.ajp.2011.11081230), 2012-02-17
Supplement: appi.ajp.2011.11081230.ds005-tables.pdf [file appi.ajp.2011.11081230.ds005-tables.pdf]

## Supplementary Tables

**Table S1. Auditory emotion recognition scores for controls vs. schizophrenia patients for stimuli defined a priori based upon physical features as utilizing pitch- vs. intensity- modulation to convey either anger (top row) or happiness (bottom) row**

| Emotion   | Pitch   |      |         |      |             | Intensity |      |         |      |          |
|-----------|---------|------|---------|------|-------------|-----------|------|---------|------|----------|
|           | Control |      | Patient |      | t (p)       | Control   |      | Patient |      | t (p)    |
| Mean      | SD      | Mean | SD      | Mean |             | SD        | Mean | SD      |      |          |
| Anger     | 31.9    | 27.8 | 19.1    | 21.5 | 2.51 (.014) | 46.9      | 17.9 | 44.6    | 16.9 | .6 (.5)  |
| Happiness | 58.3    | 33.9 | 45.3    | 31   | 2.57 (.01)  | 18.1      | 20.1 | 19.4    | 24.4 | .38 (.7) |

**Table S2. Face emotion (ER-40) measures for individual emotions in control and schizophrenia patients**

| Emotion    | Control (n=63) |      | Patient (n=77) |      | t    | p     |
|------------|----------------|------|----------------|------|------|-------|
|            | Mean           | SD   | Mean           | SD   |      |       |
| Happiness  | 98.2           | 4.9  | 96.4           | 6.4  | 1.82 | 0.07  |
| Sadness    | 84.3           | 16.0 | 75.8           | 17.1 | 3.01 | 0.003 |
| Fear       | 86.5           | 14.4 | 64.9           | 24.0 | 6.27 | <.001 |
| Anger      | 65.5           | 18.1 | 59.3           | 20.8 | 1.80 | 0.06  |
| No emotion | 87.3           | 13.2 | 72.0           | 28.8 | 3.89 | <.001 |

**Table S3. Correlations between auditory and visual emotion recognition measures by intended emotion across patients (n=77)**

| Auditory\Visual | Happiness | Sadness     | Anger | Fear | No Emotion  |
|-----------------|-----------|-------------|-------|------|-------------|
| Happiness       | 0.18      | 0.02        | 0.02  | 0.14 | 0.10        |
| Sadness         | 0.05      | <b>0.46</b> | 0.14  | 0.27 | 0.12        |
| Anger           | 0.18      | 0.28        | 0.22  | 0.02 | -0.06       |
| Fear            | 0.13      | 0.17        | 0.24  | 0.26 | 0.06        |
| No Emotion      | 0.16      | -0.04       | 0.25  | 0.22 | <b>0.51</b> |

*P* < .05

*P* < .01

**Table S4: Performance by emotion (brief battery) across all stimuli in replication sample**

|            | Patients (n=36) |      | Age-matched controls (n=31) |      | General controls (n=188) |      | Statistics |       |        |
|------------|-----------------|------|-----------------------------|------|--------------------------|------|------------|-------|--------|
|            | Mean            | SD   | Mean                        | SD   | Mean                     | SD   | F          | df    | p      |
| Happiness  | 25.8            | 18.4 | 38.3                        | 21.2 | 39.1                     | 20.1 | 6.79       | 2,252 | .001   |
| Sadness    | 61.5            | 23.5 | 75.2                        | 23.1 | 85.2                     | 18.3 | 23.3       | 2,252 | <.0001 |
| Fear       | 63.8            | 24.7 | 78.0                        | 17.3 | 77.6                     | 19.2 | 7.53       | 2,252 | .001   |
| Anger      | 44.4            | 25.9 | 59.7                        | 26.4 | 52.7                     | 20.5 | 4.06       | 2,252 | .02    |
| No emotion | 69.8            | 30.0 | 90.8                        | 17.1 | 86.2                     | 17.7 | 12.1       | 2,252 | <.0001 |
